# Supplementary material for: Facilitating the redox conversion of CoSe2 nanorods by Ti3C2Tx to improve the electrode durability as anodes for sodium-ion batteries
Source: Royal Society of Chemistry journal article supplement (doi:10.1039/d1se01655e), 2021-01-01
Supplement: d1se01655e1.pdf [file d1se01655e1.pdf]

## Supporting Information

### Facilitating the redox conversion of CoSe<sub>2</sub> nanorods by Ti<sub>3</sub>C<sub>2</sub>T<sub>x</sub> to improve the electrode durability as anodes for sodium-ion batteries

Mingshan Wang<sup>1,2\*</sup>, Anmin Peng<sup>1</sup>, Min Zeng<sup>1</sup>, Lin Chen<sup>1</sup>, Xinpeng Li<sup>1</sup>, Zhenliang Yang<sup>3</sup>, Junchen Chen<sup>1</sup>, Bingshu Guo<sup>1</sup>, Zhiyuan Ma<sup>1</sup>, Xing Li<sup>1\*</sup>

1 School of New Energy and Materials, Southwest Petroleum University, Chengdu, Sichuan 610500, P.R. China

2 Energy Storage Research Institute, Southwest Petroleum University, Chengdu, Sichuan 610500, P.R. China

3 Institute of Materials, China Academy of Engineering Physics, Mianyang, Sichuan 621908, P.R. China

#### 1. The calculation of Ti<sub>3</sub>C<sub>2</sub>T<sub>x</sub> in CoSe<sub>2</sub>/Ti<sub>3</sub>C<sub>2</sub>T<sub>x</sub>

According to the TG curves of all samples, assuming that the actual content of Ti<sub>3</sub>C<sub>2</sub>T<sub>x</sub> is X, then the actual content of TiO<sub>2</sub> and Co<sub>3</sub>O<sub>4</sub> are 93%X and (1-X)×35%, respectively.

At this time, the content of Ti<sub>3</sub>C<sub>2</sub>T<sub>x</sub> in CoSe<sub>2</sub>/Ti<sub>3</sub>C<sub>2</sub>T<sub>x</sub>-10 can be calculated by

$$(1-X) \times 35\% + 93X = 39\% \quad (S1)$$

The content of Ti<sub>3</sub>C<sub>2</sub>T<sub>x</sub> CoSe<sub>2</sub>/Ti<sub>3</sub>C<sub>2</sub>T<sub>x</sub>-25 can be calculated by

$$(1-X) \times 35\% + 93\%X = 48\% \quad (S2)$$

#### 2. The calculation of $D_{Na^+}$ .

$$D_{Na^+} = \frac{R^2 T^2}{2A^2 n^4 F^4 C^2 \sigma^2} \quad (S3)$$

$$Z' = R_r + R_{ct} + \sigma \omega^{-1/2} \quad (S4)$$

R is gas constant, T is the absolute temperature, F is the Faraday constant, n is the number of electrons, A is the active surface area of the electrode and C is the

---

\* Corresponding author. E-mail: ustbwangmingshan@163.com (Mingshan Wang), E-mail: lixing198141@163.com (Xing Li).

concentration of sodium ions in the electrolyte.  $\sigma$  is the Warburg factor,  $\omega$  is the angular frequency, which is related to  $Z'$  and can be attained from the slope of the fitting line of the EIS data.

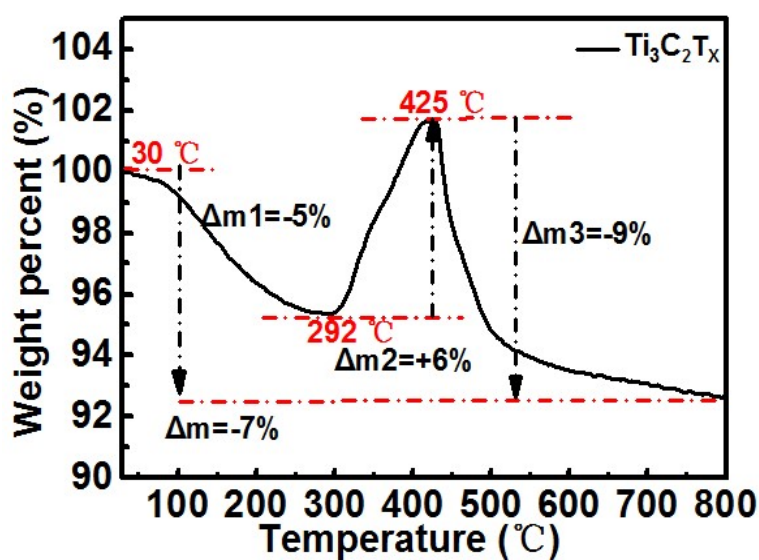

Figure S1. TG curves of  $\text{Ti}_3\text{C}_2\text{T}_x$ .

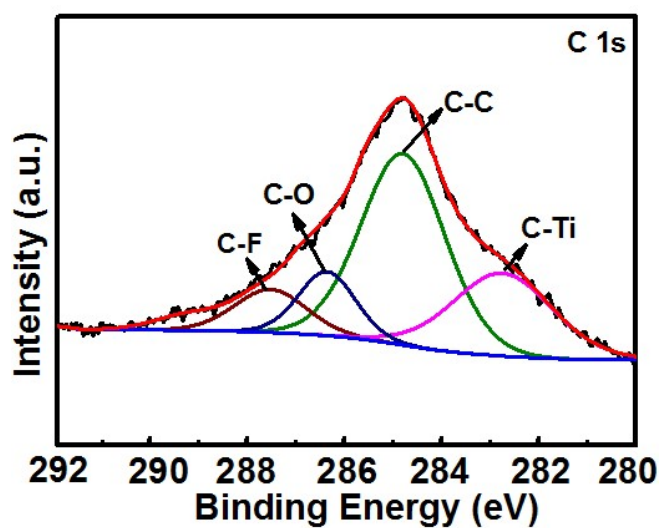

Figure S2. The  $\text{C } 1s$  spectra of  $\text{CoSe}_2/\text{Ti}_3\text{C}_2\text{T}_x-10$

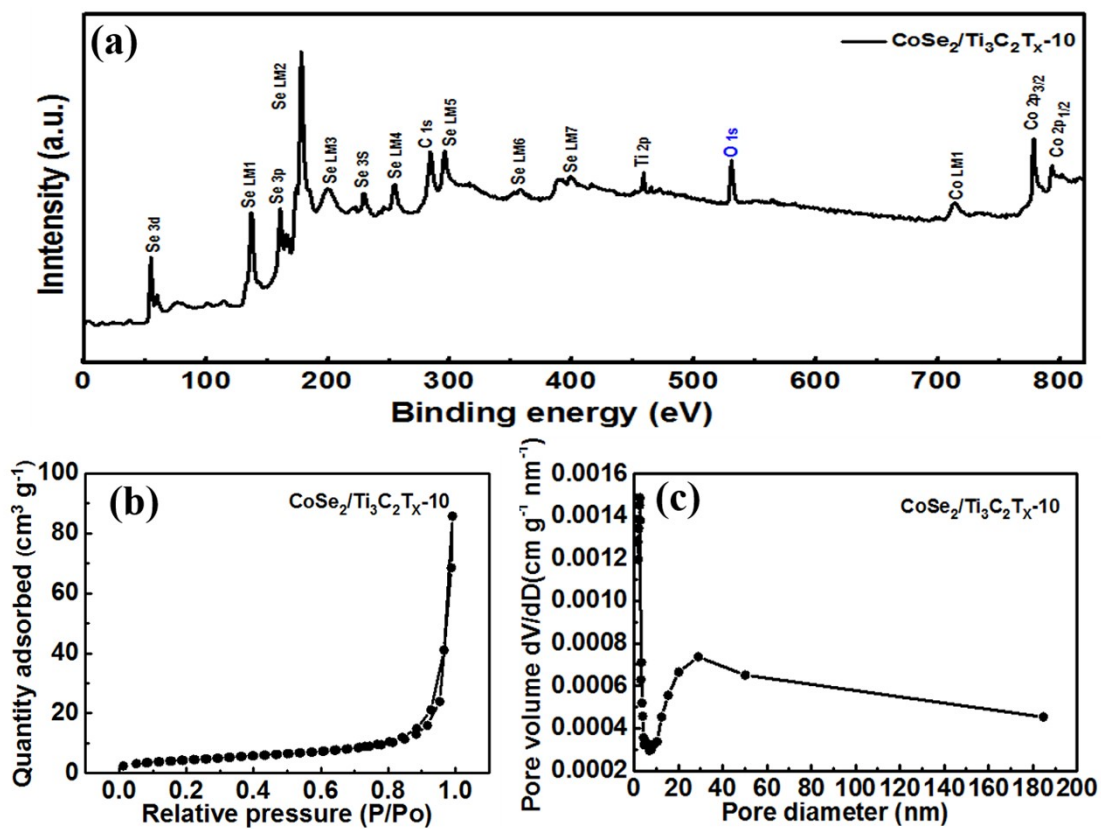

**Figure S3.** (a) The survey scan spectrum of  $\text{CoSe}_2/\text{Ti}_3\text{C}_2\text{T}_x-10$ ; (b)  $\text{N}_2$  adsorption–desorption isotherms and (c) pore size distributions of  $\text{CoSe}_2/\text{Ti}_3\text{C}_2\text{T}_x-10$ .

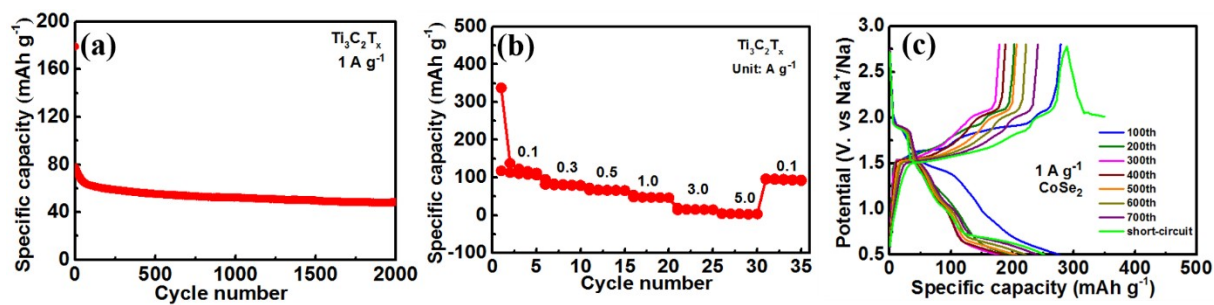

**Figure S4.** (a) Cycling performance of  $\text{Ti}_3\text{C}_2\text{T}_x$  at  $1.0 \text{ A g}^{-1}$ ; (b) Rate performance of  $\text{Ti}_3\text{C}_2\text{T}_x$ ; (c) Different cycles charge/discharge curves of  $\text{CoSe}_2$  at  $1.0 \text{ A g}^{-1}$ .

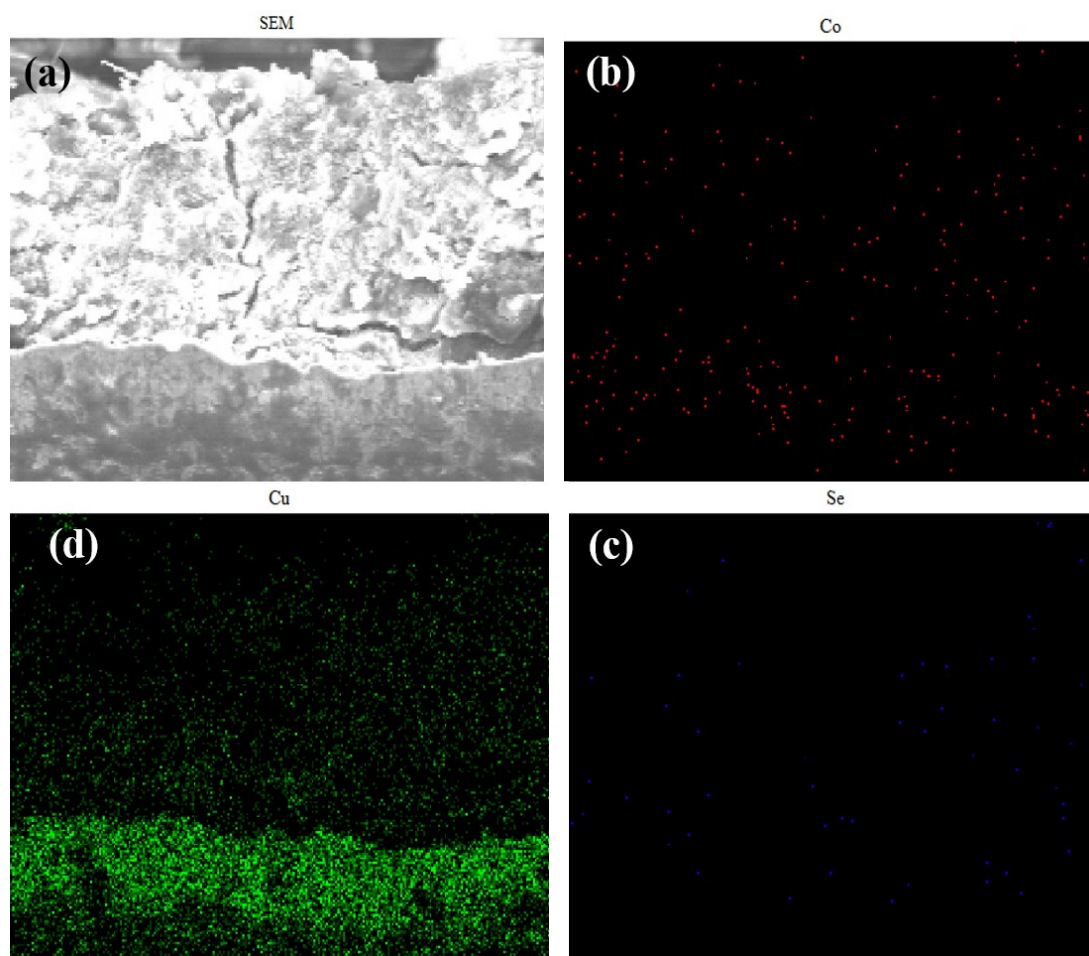

**Figure S5.** EDS mapping of  $\text{CoSe}_2/\text{Ti}_3\text{C}_2\text{T}_x-10$  after 1000 cycles at  $1 \text{ A g}^{-1}$ .

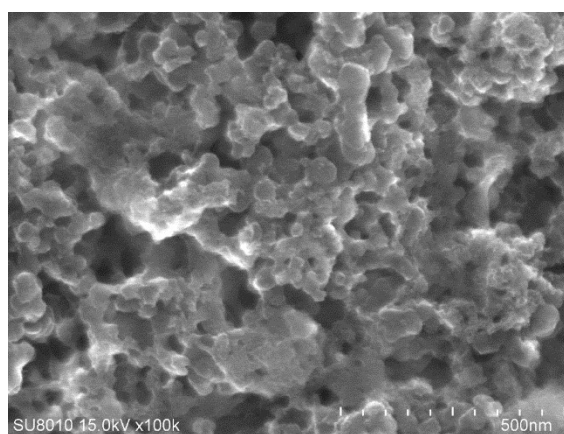

**Figure S6.** SEM image of  $\text{CoSe}_2/\text{Ti}_3\text{C}_2\text{T}_x-10$  after 1000 cycles

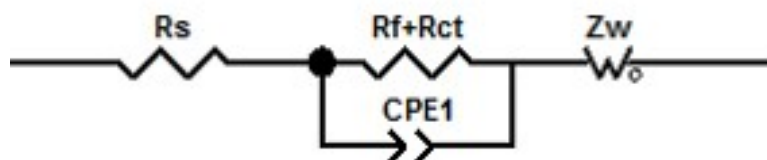

**Figure S7.** Equivalent circuit of the all electrode.

**Table S1.** The atomic content in survey scan spectrum of CoSe<sub>2</sub>/Ti<sub>3</sub>C<sub>2</sub>T<sub>x</sub>-10

| CoSe <sub>2</sub> /Ti <sub>3</sub> C <sub>2</sub> T <sub>x</sub> -10 | Peak BE | Atomic % |
|----------------------------------------------------------------------|---------|----------|
| Co2s                                                                 | 925.08  | 2.61     |
| Co2p1                                                                | 794.03  | 2.21     |
| Co2p3                                                                | 779.08  | 2.66     |
| F1s                                                                  | 684.84  | 0.19     |
| Ti2s                                                                 | 565.12  | 0.77     |
| O1s                                                                  | 531.2   | 5.37     |
| Ti2p1                                                                | 465.01  | 0.17     |
| C1s                                                                  | 284.33  | 14.96    |
| Se3s                                                                 | 230.08  | 6.68     |
| Cl2p1                                                                | 201.85  | 0.56     |
| Cl2p3                                                                | 199.41  | 0.19     |
| Se3p1                                                                | 166.64  | 1.39     |
| Se3p3                                                                | 160.82  | 3.09     |
| Co3s                                                                 | 101.38  | 2.06     |
| Co3p1                                                                | 55.31   | 7.69     |
| Co3p3                                                                | 55.31   | 3.99     |
| Ti3s                                                                 | 55.16   | 36.81    |
| Se3d                                                                 | 54.94   | 6.15     |
| Ti3p                                                                 | 37.2    | 1.34     |
| O2s                                                                  | 22.95   | 0.87     |
| Cl3s                                                                 | 15.77   | 0.23     |
| total                                                                |         | 100%     |

**Table S2.** Comparison of CoSe<sub>2</sub>-based anode in sodium-ion storage

| electrode                                                 | Rate performance<br>(current density,<br>specific capacity )                                        | Long cycles performance<br>(current density,<br>specific capacity, cycles)                                                            | Ref |
|-----------------------------------------------------------|-----------------------------------------------------------------------------------------------------|---------------------------------------------------------------------------------------------------------------------------------------|-----|
| This work                                                 | 0.1 A g <sup>-1</sup> , 450 mAh g <sup>-1</sup> ;<br>1 A g <sup>-1</sup> , 350 mAh g <sup>-1</sup>  | 0.3 A g <sup>-1</sup> , 350 mAh g <sup>-1</sup> ,<br>1200 cycles<br>10.0 A g <sup>-1</sup> , 200 mAh g <sup>-1</sup> ,<br>1400 cycles |     |
| CoSe <sub>x</sub> -rGO                                    | 0.2 A g <sup>-1</sup> , 443 mAh g <sup>-1</sup> ;<br>1 A g <sup>-1</sup> , 357 mAh g <sup>-1</sup>  | 0.3 A g <sup>-1</sup> , 420 mAh g <sup>-1</sup> ,<br>50 cycles                                                                        | 1   |
| CoSe <sub>2</sub> -Gc                                     | 0.1 A g <sup>-1</sup> , 526 mAh g <sup>-1</sup> ;<br>1 A g <sup>-1</sup> , 451 mAh g <sup>-1</sup>  | 0.2 A g <sup>-1</sup> , 399 mAh g <sup>-1</sup> ,<br>100 cycles                                                                       | 2   |
| CoSe <sub>2</sub> @N-PGC/CNTs                             | 0.2 A g <sup>-1</sup> , 482 mAh g <sup>-1</sup> ;<br>5 A g <sup>-1</sup> , 368 mAh g <sup>-1</sup>  | 1 A g <sup>-1</sup> , 300 mAh g <sup>-1</sup> ,<br>400 cycles                                                                         | 3   |
| CoSe <sub>2</sub> -(NiCo)Se <sub>2</sub>                  | 0.2 A g <sup>-1</sup> , 554 mAh g <sup>-1</sup> ;<br>5 A g <sup>-1</sup> , 456 mAh g <sup>-1</sup>  | 1 A g <sup>-1</sup> , 410 mAh g <sup>-1</sup> ,<br>100 cycles                                                                         | 4   |
| Co <sub>0.85</sub> Se@rGO                                 | 0.5 A g <sup>-1</sup> , 448 mAh g <sup>-1</sup> ;<br>6 A g <sup>-1</sup> , 280 mAh g <sup>-1</sup>  | 1 A g <sup>-1</sup> , 382 mAh g <sup>-1</sup> ,<br>800 cycles                                                                         | 5   |
| CoSe <sub>2</sub> /N-CNFs                                 | 0.2 A g <sup>-1</sup> , 323 mAh g <sup>-1</sup> ;<br>2 A g <sup>-1</sup> , 299 mAh g <sup>-1</sup>  | 2 A g <sup>-1</sup> , 308 mAh g <sup>-1</sup> ,<br>1000 cycles                                                                        | 6   |
| CoSe <sub>2</sub> -MoSe <sub>2</sub> /C                   | 0.2 A g <sup>-1</sup> , 483 mAh g <sup>-1</sup> ;<br>5 A g <sup>-1</sup> , 317 mAh g <sup>-1</sup>  | 0.2 A g <sup>-1</sup> , 399 mAh g <sup>-1</sup> ,<br>100 cycles                                                                       | 7   |
| CoSe <sub>2</sub>                                         | 0.2 A g <sup>-1</sup> , 483 mAh g <sup>-1</sup> ;<br>5 A g <sup>-1</sup> , 317 mAh g <sup>-1</sup>  | 1 A g <sup>-1</sup> , 220 mAh g <sup>-1</sup> ,<br>1690 cycles                                                                        | 8   |
| CoSe <sub>2</sub> @MoSe <sub>2</sub> /C                   | 0.1 A g <sup>-1</sup> , 460 mAh g <sup>-1</sup> ;<br>3 A g <sup>-1</sup> , 379 mAh g <sup>-1</sup>  | 1 A g <sup>-1</sup> , 305 mAh g <sup>-1</sup> ,<br>200 cycles                                                                         | 9   |
| Ni <sub>1.8</sub> Co <sub>1.2</sub> Se <sub>4</sub> @NDDC | 0.1 A g <sup>-1</sup> , 427 mAh g <sup>-1</sup> ;<br>50 A g <sup>-1</sup> , 153 mAh g <sup>-1</sup> | 0.5 A g <sup>-1</sup> , 379.3 mAh g <sup>-1</sup> ,<br>100 cycles                                                                     | 10  |
| CoMSe <sub>2</sub> @NC, M = Ni,<br>Cu, Zn                 | 0.1 A g <sup>-1</sup> , 511 mAh g <sup>-1</sup> ;<br>2 A g <sup>-1</sup> , 291 mAh g <sup>-1</sup>  | 0.5 A g <sup>-1</sup> , 474 mAh g <sup>-1</sup> ,<br>80 cycles                                                                        | 11  |
| CoSe <sub>2</sub> @C∩NC                                   | 0.1 A g <sup>-1</sup> , 366 mAh g <sup>-1</sup> ;<br>25 A g <sup>-1</sup> , 291 mAh g <sup>-1</sup> | 5 A g <sup>-1</sup> , 234 mAh g <sup>-1</sup> ,<br>2000 cycles                                                                        | 12  |
| Ni <sub>x</sub> Co <sub>1-x</sub> Se <sub>2</sub>         | 0.1 A g <sup>-1</sup> , 525 mAh g <sup>-1</sup> ;<br>5 A g <sup>-1</sup> , 346 mAh g <sup>-1</sup>  | 2 A g <sup>-1</sup> , 321 mAh g <sup>-1</sup> ,<br>2000 cycles                                                                        | 13  |
| CNT/CoSe <sub>2</sub> @NC                                 | 0.2 A g <sup>-1</sup> , 480 mAh g <sup>-1</sup> ;<br>5 A g <sup>-1</sup> , 364 mAh g <sup>-1</sup>  | 0.2 A g <sup>-1</sup> , 404 mAh g <sup>-1</sup> ,<br>120 cycles                                                                       | 14  |

|                                        |                                                                                                      |                                                                  |    |
|----------------------------------------|------------------------------------------------------------------------------------------------------|------------------------------------------------------------------|----|
| Co <sub>0.85</sub> Se/N-<br>HMCNs/CNTs | 0.1 A g <sup>-1</sup> , 361 mAh g <sup>-1</sup> ;<br>5 A g <sup>-1</sup> , 132 mAh g <sup>-1</sup>   | 1 A g <sup>-1</sup> , 102 mAh g <sup>-1</sup> ,<br>1000 cycles   | 15 |
| CoSe <sub>2</sub> @NC@TiO <sub>2</sub> | 0.1 A g <sup>-1</sup> , 500 mAh g <sup>-1</sup> ;<br>6.4 A g <sup>-1</sup> , 300 mAh g <sup>-1</sup> | 0.1 A g <sup>-1</sup> , 364 mAh g <sup>-1</sup> ,<br>200 cycles  | 16 |
| NiCoSe <sub>4</sub> @NC@rGO            | 0.1 A g <sup>-1</sup> , 503 mAh g <sup>-1</sup> ;<br>10 A g <sup>-1</sup> , 439 mAh g <sup>-1</sup>  | 1 A g <sup>-1</sup> , 293 mAh g <sup>-1</sup> ,<br>1500 cycles   | 17 |
| CNT/CoSe <sub>2</sub> /C               | 0.1 A g <sup>-1</sup> , 609 mAh g <sup>-1</sup> ;<br>2.4 A g <sup>-1</sup> , 224 mAh g <sup>-1</sup> | 0.5 A g <sup>-1</sup> , 396 mAh g <sup>-1</sup> ,<br>300 cycles  | 18 |
| CoSe <sub>2</sub> @BCN                 | 0.1 A g <sup>-1</sup> , 632 mAh g <sup>-1</sup> ;<br>2 A g <sup>-1</sup> , 338 mAh g <sup>-1</sup>   | 8.0 A g <sup>-1</sup> , 300 mAh g <sup>-1</sup> ,<br>4000 cycles | 19 |
| DCC-CoSe <sub>2</sub>                  | 0.1 A g <sup>-1</sup> , 609 mAh g <sup>-1</sup> ;<br>2.4 A g <sup>-1</sup> , 224 mAh g <sup>-1</sup> | 5 A g <sup>-1</sup> , 430 mAh g <sup>-1</sup> ,<br>2000 cycles   | 20 |
| (Ni,Co)Se <sub>2</sub> /CNT            | 0.5 A g <sup>-1</sup> , 444 mAh g <sup>-1</sup> ;<br>20 A g <sup>-1</sup> , 163 mAh g <sup>-1</sup>  | 3 A g <sup>-1</sup> , 336 mAh g <sup>-1</sup> ,<br>10000 cycles  | 21 |



**Table S3.** Electrochemical resistances of CoSe<sub>2</sub>, CoSe<sub>2</sub>/Ti<sub>3</sub>C<sub>2</sub>T<sub>x</sub>-10 an CoSe<sub>2</sub>/Ti<sub>3</sub>C<sub>2</sub>T<sub>x</sub>-25 fresh state, after 200<sup>th</sup> and 500<sup>th</sup> cycles

| Sample                                                               | Fresh<br>$R_s/(R_f+R_{ct})$ | After 200 cycles<br>$R_s/(R_f+R_{ct})$ | After 500 cycles<br>$R_s/(R_f+R_{ct})$ |
|----------------------------------------------------------------------|-----------------------------|----------------------------------------|----------------------------------------|
| CoSe <sub>2</sub>                                                    | 2.4/739.6 $\Omega$          | 11.3/36.5 $\Omega$                     | 8.9/5.9 $\Omega$                       |
| CoSe <sub>2</sub> /Ti <sub>3</sub> C <sub>2</sub> T <sub>x</sub> -10 | 1.2/307.1 $\Omega$          | 10.4/8.9 $\Omega$                      | 9.8/4.1 $\Omega$                       |
| CoSe <sub>2</sub> /Ti <sub>3</sub> C <sub>2</sub> T <sub>x</sub> -25 | 1.4/472.5 $\Omega$          | 9.9/12.3 $\Omega$                      | 9.8/5.7 $\Omega$                       |

1. G. D. Park, Y. C. Kang. *Chem. Eur. J.* 2016, **22**, 4140-6.
2. J. S. Cho, J. M. Won, J.-K. Lee, Y. C. Kang. *Nano Energy* 2016, **26**, 466-478.
3. S.-K. Park, J. K. Kim, Y. C. Kang. *Chem. Eng. J.* 2017, **328**, 546-555.
4. S.-K. Park, J. K. Kim, Y. Chan Kang. *J. Mater. Chem. A* 2017, **5**, 18823-18830.
5. Y. Huang, Z. Wang, Y. Jiang, S. Li, Z. Li, H. Zhang, F. Wu, M. Xie, L. Li, R. Chen. *Nano Energy* 2018, **53**, 524-535.
6. C. Cui, Z. Wei, G. Zhou, W. Wei, J. Ma, L. Chen, C. Li. *J. Mater. Chem. A* 2018, **6**, 7088-7098.
7. J. K. Kim, J. H. Kim, Y. C. Kang. *Chem. Eng. J.* 2018, **333**, 665-677.
8. X. Ma, L. Zou, W. Zhao. *Chem. Commun.* 2018, **54**, 10507-10510.
9. J. Gao, Y. Li, L. Shi, J. Li, G. Zhang. *ACS Appl. Mater. Interfaces* 2018, **10**, 20635-20642.
10. B.-H. Hou, Y.-Y. Wang, D.-S. Liu, Z.-Y. Gu, X. Feng, H. Fan, T. Zhang, C. Lü, X.-L. Wu. *Adv. Funct. Mater.* 2018, **28**.
11. Y. Jiang, G. Zou, H. Hou, J. Li, C. Liu, X. Qiu, X. Ji. *ACS Nano* 2019, **13**, 10787-10797.
12. B. Li, Y. Liu, X. Jin, S. Jiao, G. Wang, B. Peng, S. Zeng, L. Shi, J. Li, G. Zhang. *Small* 2019, **15**, e1902881.
13. Y. He, M. Luo, C. Dong, X. Ding, C. Yin, A. Nie, Y. Chen, Y. Qian, L. Xu. *J. Mater. Chem. A* 2019, **7**, 3933-3940.
14. S. H. Yang, S.-K. Park, Y. C. Kang. *Chem. Eng. J.* 2019, **370**, 1008-1018.

15. K. Zhou, Y. Han, D. Tang, H. Wu, X. Wu, G. Diao, H. Li, M. Chen. *Adv. Mater. Interfaces* 2019, **7**.
16. B. Zhao, Q. Liu, G. Wei, J. Wang, X.-Y. Yu, X. Li, H. B. Wu. *Chem. Eng. J.* 2019, **378**.
17. X. Huang, S. Men, H. Zheng, D. D. Qin, X. Kang. *Chem Asian J* 2020, **15**, 1456-1463.
18. M. Yousaf, Y. Chen, H. Tabassum, Z. Wang, Y. Wang, A. Y. Abid, A. Mahmood, N. Mahmood, S. Guo, R. P. S. Han, P. Gao. *Adv Sci*, 2020, **7**, 1902907.
19. H. Tabassum, C. Zhi, T. Hussain, T. Qiu, W. Aftab, R. Zou. *Adv. Energy Mater.* 2019, **9**.
20. J. Tian, J. Li, Y. Zhang, X.-Y. Yu, Z. Hong. *J. Mater. Chem. A* 2019, **7**, 21404-21409.
21. S. H. Oh, J. S. Cho. *J. Alloys Compd.* 2019, **806**, 1029-1038.
